# Supplementary material
Source: ML conference proceedings conference paper supplement (https://openaccess.thecvf.com/content/CVPR2025/html/Zhu_PassionSR_Post-Training_Quantization_CVPR_2025_paper.html)
Supplement: Supplementary file 1 [file Zhu_PassionSR_Post-Training_Quantization_CVPR_2025_supplemental.pdf]

# ***PassionSR: Post-Training Quantization with Adaptive Scale in One-Step Diffusion based Image Super-Resolution Supplemental Materials***

**Libo Zhu<sup>1</sup>, Jianze Li<sup>1</sup>, Haotong Qin<sup>2\*</sup>,  
Yulun Zhang<sup>1\*</sup>, Yong Guo<sup>3</sup>, Xiaokang Yang<sup>1</sup>**

<sup>1</sup>Shanghai Jiao Tong University, <sup>2</sup>ETH Zürich, <sup>3</sup>Max Planck Institute for Informatics

## **1. Additional Visual Comparison**

In addition to the visual comparison images provided in the main text, we offer additional visual comparison figures in Fig. 1. It indicates that PassionSR gains better visual effects than other comparative previous methods.

## **2. UNet-only quantization**

Considering that the previous methods only quantize the UNet, we design a UNet-only experiment to make the comparison more fair. The Unet-only refers to only quantizing the UNet while VAE keeps full precision. We aim to analyze the quantization effects of various quantization methods on Unet-only setting in this experiment.

**Quantitative Results.** In the UNet-only quantization experiment, as shown in Tab. 1, PassionSR demonstrates a significant improvement over previous methods under W8A8 and W6A6 settings. The experiments phenomena and results are similar to the UNet-VAE experiment. On every dataset, 8-bit PassionSR achieves results comparable to the full-precision OSediff and even surpasses it in certain cases. In contrast, other quantization methods show noticeable drops in quantitative performance. For 6-bit quantization, contrast methods such as LSQ and Q-Diffusion yield lower structural metrics (*e.g.*, PSNR and SSIM) but achieve higher scores in non-reference IQA metrics. PassionSR, however, delivers the best reference IQA results while maintaining relatively lower non-reference IQA scores compared to other methods. The quantitative experimental results indicate that PassionSR achieves relatively the best quantization performance on the UNet. Comparatively, under the same quantization bits setting, the UNet-only quantized model gains slightly better effects than UNet-VAE one. The little performance drop is brought by the precision reduction of VAE.

**Visual Comparison.** Figure 3 presents a visual comparison ( $\times 4$ ) for the UNet-only quantization. To highlight the differences, we select several challenging examples for analysis. The visual comparison results are also similar to UNet-VAE quantization experiment results. Compared to existing methods, PassionSR produces sharper details and more realistic textures, with results closely comparative with those of the full-precision model. Remarkably, in some cases, PassionSR even outperforms its full-precision counterpart, PassionSR-FP. It indicates that PassionSR still gains better visual effects in the Unet-only quantization.

## **3. Implementation of Comparative methods**

Considering that there aren't quantization works for One-Step Diffusion based Image Super-Resolution (OSDISR), we implement many comparative methods based on their released code. However, owing to the difference of full-precision backbones, we encounter some problems while performing model migration with the implementation code. We make appropriate modifications to address these issues.

### **3.1. Q-Diffusion [5]**

Q-Diffusion is an impressing quantization method on multi-step diffusion models. It performs well on quantizing Latent Diffusion (LDM) [7] for higher resolution LSUN [10] experiments. In the Q-Diffusion calibration process, it uniformly samples UNet inputs at different timesteps for its calibration dataset. We utilize the calibration dataset constructed for our PassionSR in Q-Diffusion. Q-Diffusion calibrates the weight quantizers and the activation quantizers separately. We find that GPU consumption of calibrating the activation quantizers is obviously larger and memory overflow issue happens in RTX A6000. We originally intended to use the same parameters for calibration as in the Q-Diffusion implementation. But we find that calibration time is too long so we reduce the number of the calibration epochs while ensuring that the quantization process has converged. We adopt the same implementation on the quantization of VAE, calibrating them separately.

---

\*Corresponding authors: Haotong Qin and Yulun Zhang

### 3.2. EfficientDM [2]

EfficientDM is a newly proposed quantization method on multi-step diffusion models. Based on the QALoRA [9] to finetune the weight and quantization parameters, EfficientDM performs outstanding ability in minimizing quantization errors. When we apply EfficientDM to PassionSR-FP, the original quantization setting is kept. Because the code EfficientDM provides only supports the 2, 4 and 8 bits quantization, we made appropriate modifications to it. The main reason why only quantization with bit widths that are powers of 2 is supported lies behind that EfficientDM attempts to store quantized weight. The storing of tensor matrix in Pytorch only supports bit widths that are powers of 2. Considering that we only need fake quantization to simulate quantization errors, we remove this part so that 6 bit quantization we adopt can be supported by EfficientDM. The removed parts are unrelated to the quantization algorithms of EfficientDM, not affecting the quantization performance.

### 4. Detailed algorithm of PassionSR

---

#### Algorithm 1 PassionSR Calibration

---

**Require:** Pretrained full precision one-step diffusion based image super-resolution (OSDIR) model [ $W$ ]

**Require:** Quantized low bits OSDIR model [ $\hat{W}$ ]

**Require:** Dataset [ $D$ ] consisted of low, high resolution image pairs randomly cropped from  $W$ 's training datasets

```

1: Initialize the quantization parameters of  $\hat{W}$  with  $D$ 
2: Q-list = [VAE encoder, UNet, VAE decoder] in  $\hat{W}$ 
3: F-list = [VAE encoder, UNet, VAE decoder] in  $W$ 
4: Initialize calibration dataset  $D_q = D$ 
5: for  $\hat{M}$ ,  $M$  in Q-list, F-list do
6:   for  $n = 1, \dots, N$  epochs do
7:     for  $i$  in  $D_q$  do
8:        $Loss = \|\hat{M}(i) - M(i)\|_2$ 
9:       Update  $\hat{M}$ 's LET component with  $Loss$ 
10:      Reinitialize  $\hat{M}$ 's LBQ component
11:     end for
12:   end for
13: for  $n = 1, \dots, N$  epochs do
14:   for  $i$  in  $D_q$  do
15:      $Loss = \|\hat{M}(i) - M(i)\|_2$ 
16:     Update  $\hat{M}$ 's LBQ component with  $Loss$ 
17:   end for
18: end for
19: for  $i$  in  $D_q$  do
20:   Update  $D_q$  with  $\hat{M}(i)$ 
21: end for
22: end for
```

---

### 5. Visual Comparison of Ablation Study

To make the ablation study more convincing, we not only provide quantative results in the main text but also include additional visual results in Fig. 2. To illustrate the effects of each component, we separate our PassionSR into three parts, LBQ (learnable boundary quantizer), LET (learnable equivalent transformation) and DQC (distributed quantization calibration). Based on the MaxMin [4] baseline, we sequentially incorporate LBQ, LET, and DQC to investigate the role of each component. Under the setting of W6A6, MaxMin maintains basic structural information but has a lot of color distortions. The introduction of LBQ and LET gradually solves the color distortions problem while the details in the images are more realistic. Although DQC is used for stabilizing the calibrating process, there are also slight performance increase after applying DQC.

### References

- [1] Steven K Esser, Jeffrey L McKinstry, Deepika Bablani, Rathinakumar Appuswamy, and Dharmendra S Modha. Learned step size quantization. In *ICLR*, 2020. 3, 4, 5
- [2] Yefei He, Jing Liu, Weijia Wu, Hong Zhou, and Bohan Zhuang. Efficientdm: Efficient quantization-aware fine-tuning of low-bit diffusion models. In *ICLR*, 2024. 2, 3, 4, 5
- [3] Benoit Jacob, Skirmantas Kligys, Bo Chen, Menglong Zhu, Matthew Tang, Andrew Howard, Hartwig Adam, and Dmitry Kalenichenko. Quantization and training of neural networks for efficient integer-arithmetic-only inference. In *CVPR*, 2018. 4
- [4] Eli Kravchik, Fan Yang, Pavel Kisilev, and Yoni Choukroun. Low-bit quantization of neural networks for efficient inference. In *ICCVW*, 2019. 2, 3, 4, 5
- [5] Xiuyu Li, Yijiang Liu, Long Lian, Huanrui Yang, Zhen Dong, Daniel Kang, Shanghang Zhang, and Kurt Keutzer. Q-diffusion: Quantizing diffusion models. In *ICCV*, 2023. 1, 3, 4, 5
- [6] Xinqi Lin, Jingwen He, Ziyang Chen, Zhaoyang Lyu, Bo Dai, Fanghua Yu, Wanli Ouyang, Yu Qiao, and Chao Dong. Diff-bir: Towards blind image restoration with generative diffusion prior. In *ECCV*, 2024. 3, 5
- [7] Robin Rombach, Andreas Blattmann, Dominik Lorenz, Patrick Esser, and Björn Ommer. High-resolution image synthesis with latent diffusion models. In *CVPR*, 2022. 1
- [8] Rongyuan Wu, Lingchen Sun, Zhiyuan Ma, and Lei Zhang. One-step effective diffusion network for real-world image super-resolution. In *NeurIPS*, 2024. 3, 4, 5
- [9] Yuhui Xu, Lingxi Xie, Xiaotao Gu, Xin Chen, Heng Chang, Hengheng Zhang, Zhengsu Chen, Xiaopeng Zhang, and Qi Tian. Qa-lora: Quantization-aware low-rank adaptation of large language models. In *ICLR*, 2024. 2
- [10] Fisher Yu, Ari Seff, Yinda Zhang, Shuran Song, Thomas Funkhouser, and Jianxiong Xiao. Lsun: Construction of a large-scale image dataset using deep learning with humans in the loop. In *CVPR*, 2015. 1



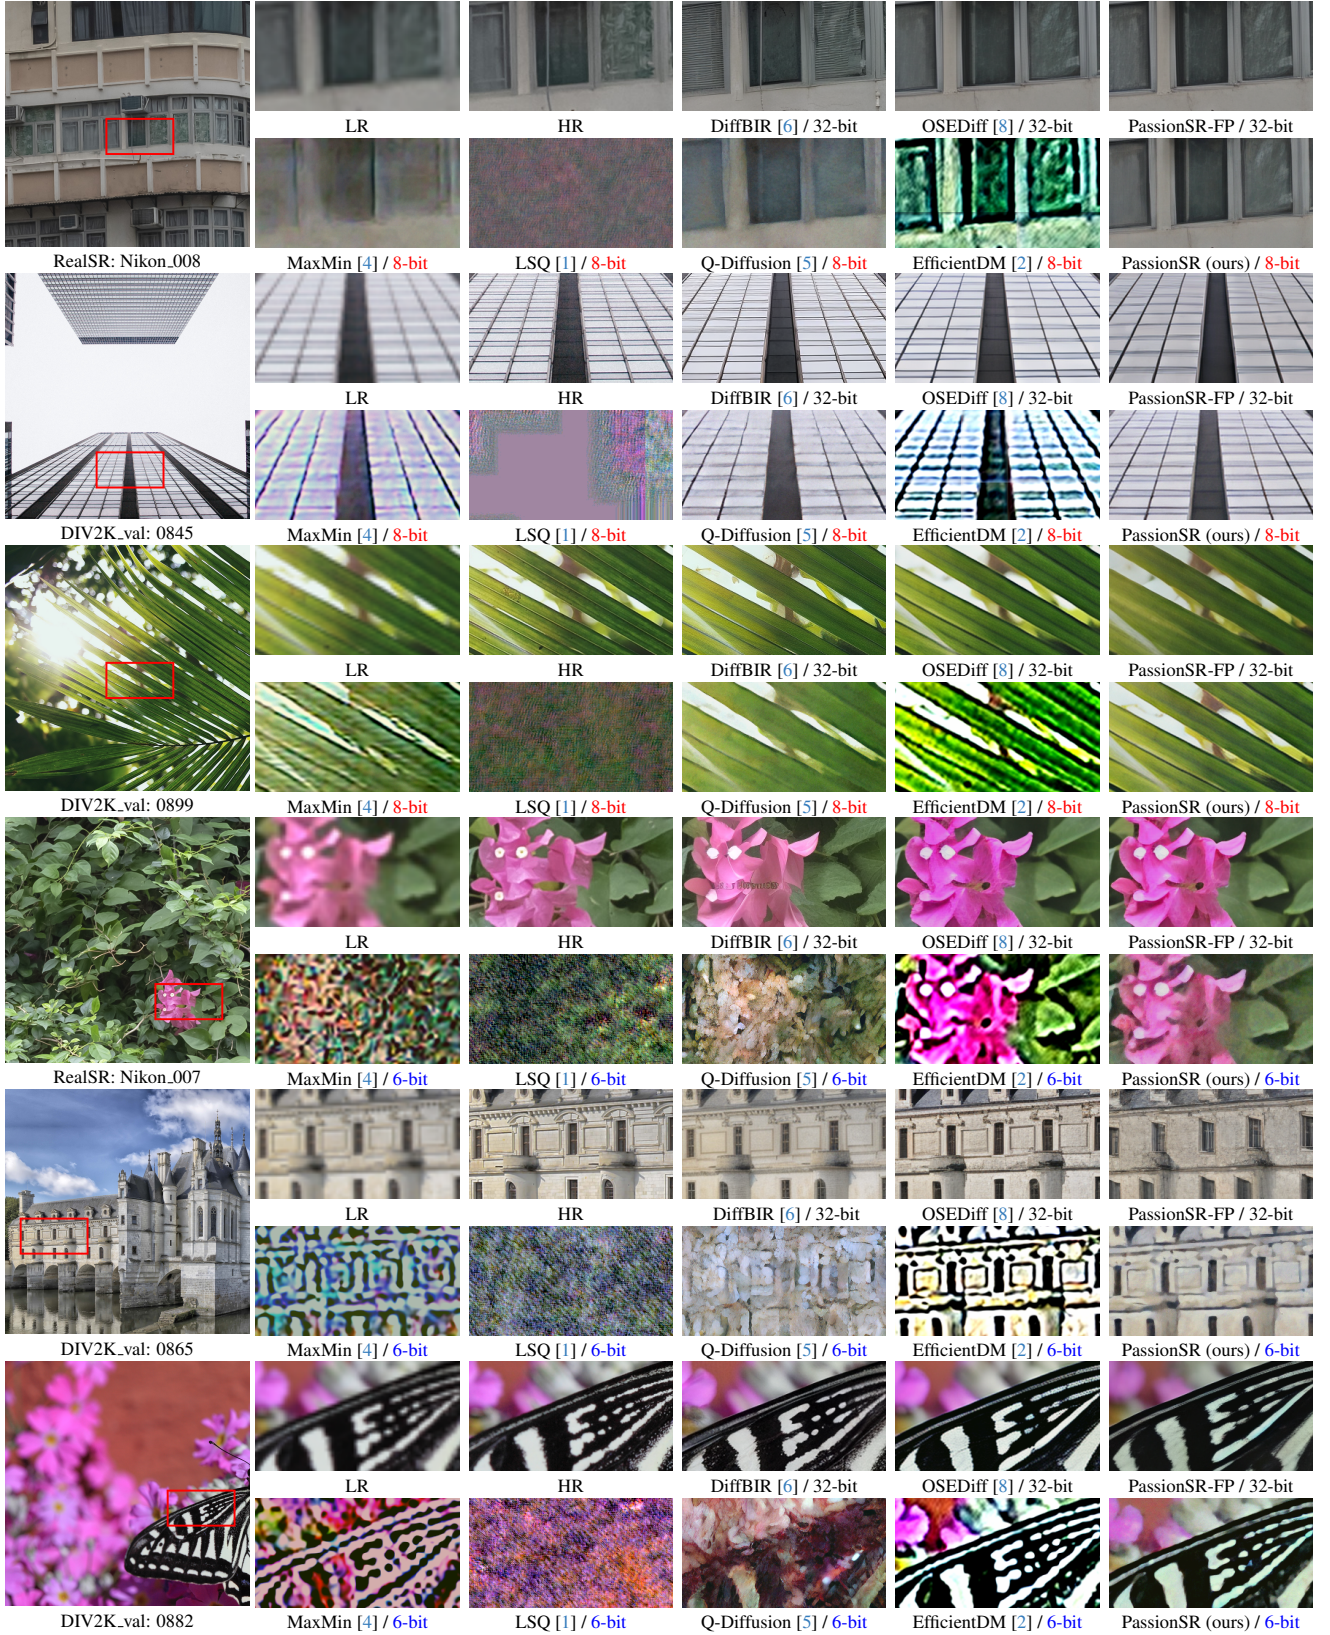

Figure 1. Visual comparison ( $\times 4$ ) with high-resolution image, full-precision model’s output and different quantization methods in some challenging cases at **W8A8** and **W6A6 UNet-VAE quantization**. PassionSR gains significant visual advantages over other methods.



| Datasets  | Bits   | Methods          | PSNR $\uparrow$ | SSIM $\uparrow$ | LPIPS $\downarrow$ | DISTS $\downarrow$ | NIQE $\downarrow$ | MUSIQ $\uparrow$ | MANIQA $\uparrow$ | CLIP-IQA $\uparrow$ |
|-----------|--------|------------------|-----------------|-----------------|--------------------|--------------------|-------------------|------------------|-------------------|---------------------|
| RealSR    | W32A32 | OSDiff [8]       | 25.27           | 0.7379          | 0.3027             | 0.1808             | 4.355             | 67.43            | 0.4766            | 0.6835              |
|           |        | PassionSR-FP     | 25.39           | 0.7460          | 0.2984             | 0.1813             | 4.453             | 67.05            | 0.4680            | 0.6796              |
|           | W8A8   | MaxMin [3]       | 23.16           | 0.6875          | 0.5463             | 0.2879             | 7.932             | 32.92            | 0.1849            | 0.2363              |
|           |        | LSQ [1]          | 15.39           | 0.3375          | 0.9944             | 0.5427             | 10.08             | 50.11            | 0.3533            | 0.3173              |
|           |        | Q-Diffusion [5]  | 24.88           | 0.6967          | 0.4993             | 0.2696             | 8.437             | 44.69            | 0.2352            | 0.5604              |
|           |        | EfficientDM [2]  | 14.77           | 0.4253          | 0.5478             | 0.3462             | 7.526             | 44.75            | 0.2568            | 0.4000              |
|           |        | PassionSR (ours) | <b>25.67</b>    | <b>0.7499</b>   | <b>0.3140</b>      | <b>0.1932</b>      | <b>5.654</b>      | <b>65.88</b>     | <b>0.4437</b>     | <b>0.6912</b>       |
|           | W6A6   | MaxMin [3]       | 15.55           | 0.2417          | 0.8018             | 0.4449             | 9.263             | 42.15            | 0.2791            | 0.4174              |
|           |        | LSQ [1]          | 13.73           | 0.1081          | 1.0900             | 0.5450             | 8.430             | 53.61            | 0.3036            | 0.4396              |
|           |        | Q-Diffusion [5]  | 19.75           | 0.4727          | 0.6877             | 0.4024             | <b>7.381</b>      | <b>56.46</b>     | <b>0.4380</b>     | <b>0.6439</b>       |
|           |        | EfficientDM [2]  | 14.75           | 0.4386          | 0.5233             | 0.3451             | 7.497             | 42.97            | 0.2498            | 0.3740              |
|           |        | PassionSR (ours) | <b>25.15</b>    | <b>0.7196</b>   | <b>0.4199</b>      | <b>0.2592</b>      | 8.618             | 44.43            | 0.2131            | 0.4612              |
| DRealSR   | W32A32 | OSDiff [8]       | 25.57           | 0.7885          | 0.3447             | 0.1808             | 4.371             | 37.22            | 0.4794            | 0.7540              |
|           |        | PassionSR-FP     | 26.70           | 0.7978          | 0.3339             | 0.1765             | 4.336             | 37.03            | 0.4686            | 0.7520              |
|           | W8A8   | MaxMin [3]       | 24.97           | 0.7989          | 0.5091             | 0.2921             | 8.215             | 24.05            | 0.1846            | 0.3163              |
|           |        | LSQ [1]          | 14.56           | 0.1795          | 1.1661             | 0.592              | 10.19             | 29.07            | 0.4010            | 0.3970              |
|           |        | Q-Diffusion [5]  | 27.14           | 0.7184          | 0.4765             | 0.2895             | 9.861             | 26.44            | 0.2284            | 0.5608              |
|           |        | EfficientDM [2]  | 15.55           | 0.4183          | 0.6291             | 0.3555             | 6.859             | 28.61            | 0.2468            | 0.4150              |
|           |        | PassionSR (ours) | <b>27.41</b>    | <b>0.8146</b>   | <b>0.3422</b>      | <b>0.1918</b>      | <b>6.070</b>      | <b>33.56</b>     | <b>0.4286</b>     | <b>0.7554</b>       |
|           | W6A6   | MaxMin [3]       | 13.08           | 0.2291          | 0.8131             | 0.5077             | 10.51             | <b>35.83</b>     | 0.2702            | 0.3864              |
|           |        | LSQ [1]          | 12.95           | 0.0934          | 1.1890             | 0.5833             | 8.591             | 26.39            | 0.2911            | 0.5600              |
|           |        | Q-Diffusion [5]  | 21.75           | 0.6096          | 0.7008             | 0.4039             | 6.854             | 24.39            | <b>0.4109</b>     | <b>0.6696</b>       |
|           |        | EfficientDM [2]  | 15.07           | 0.4287          | 0.6127             | 0.357              | <b>6.690</b>      | 28.37            | 0.2351            | 0.3973              |
|           |        | PassionSR (ours) | <b>26.62</b>    | <b>0.7984</b>   | <b>0.4429</b>      | <b>0.2571</b>      | 8.484             | 26.26            | 0.1824            | 0.4358              |
| DIV2K_val | W32A32 | OSDiff [8]       | 24.95           | 0.7154          | 0.2325             | 0.1197             | 3.616             | 68.92            | 0.4340            | 0.6842              |
|           |        | PassionSR-FP     | 25.16           | 0.7221          | 0.2373             | 0.1185             | 3.573             | 69.27            | 0.4402            | 0.6958              |
|           | W8A8   | MaxMin [3]       | 22.33           | 0.6618          | 0.5639             | 0.2731             | 7.563             | 33.68            | 0.1913            | 0.2818              |
|           |        | LSQ [1]          | 13.90           | 0.2537          | 0.9932             | 0.5515             | 9.578             | 48.11            | 0.3512            | 0.3246              |
|           |        | Q-Diffusion [5]  | 24.20           | 0.6813          | 0.3997             | 0.2400             | 7.955             | 51.95            | 0.2709            | 0.6243              |
|           |        | EfficientDM [2]  | 15.24           | 0.4954          | 0.6041             | 0.3374             | 6.856             | 48.78            | 0.2685            | 0.4235              |
|           |        | PassionSR (ours) | <b>25.11</b>    | <b>0.7199</b>   | <b>0.2496</b>      | <b>0.1277</b>      | <b>4.424</b>      | <b>67.92</b>     | <b>0.3993</b>     | <b>0.6939</b>       |
|           | W6A6   | MaxMin [3]       | 11.66           | 0.1606          | 0.8509             | 0.4966             | 11.30             | 45.47            | 0.2764            | 0.3523              |
|           |        | LSQ [1]          | 12.21           | 0.0858          | 1.0695             | 0.5424             | 8.564             | <b>52.74</b>     | 0.2872            | 0.4692              |
|           |        | Q-Diffusion [5]  | 18.92           | 0.4939          | 0.6227             | 0.3718             | <b>6.162</b>      | 51.50            | <b>0.3946</b>     | <b>0.5814</b>       |
|           |        | EfficientDM [2]  | 15.09           | 0.4991          | 0.5953             | 0.3292             | 6.900             | 46.01            | 0.2570            | 0.4007              |
|           |        | PassionSR (ours) | <b>24.34</b>    | <b>0.7097</b>   | <b>0.3440</b>      | <b>0.2075</b>      | 7.039             | 51.19            | 0.2267            | 0.4802              |

Table 1. Quantitative UNet-only quantization experiments results. PassionSR-FP is used as full-precision backbones rather than original OSDiff. W8A8 denotes 8 bits weight and 8 bits activation quantization. The best results in the same setting are colored with red.

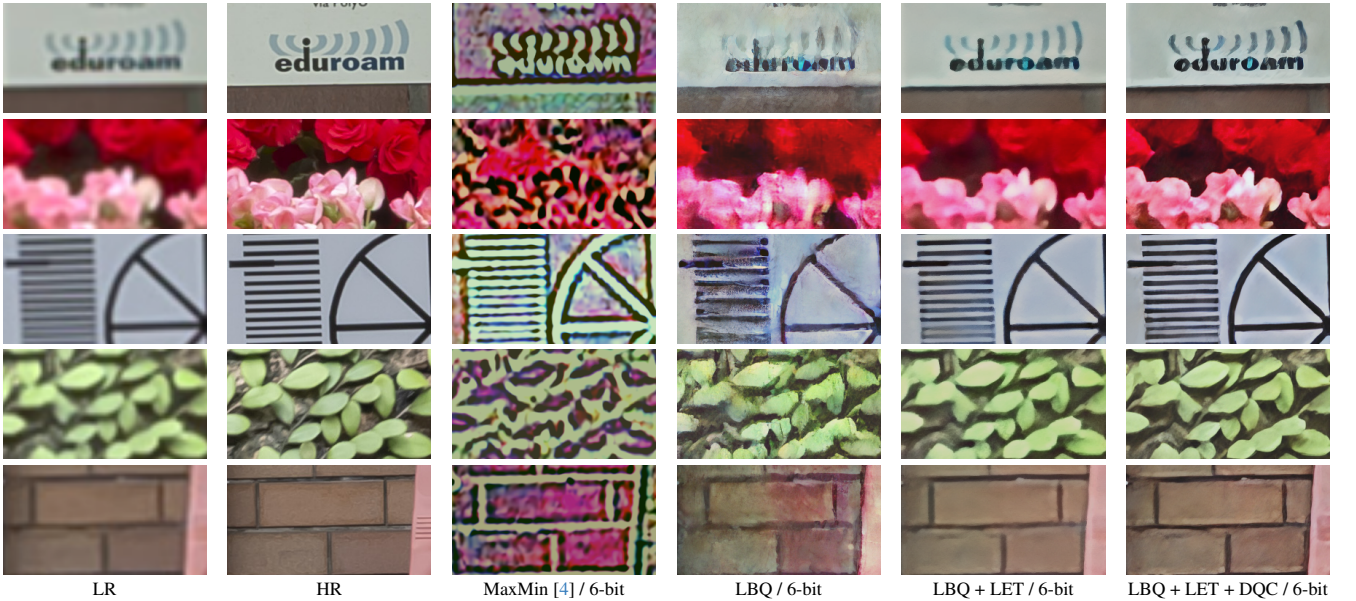

Figure 2. Visual comparison ( $\times 4$ ) with low-resolution, high-resolution images and different quantization settings in ablation study.



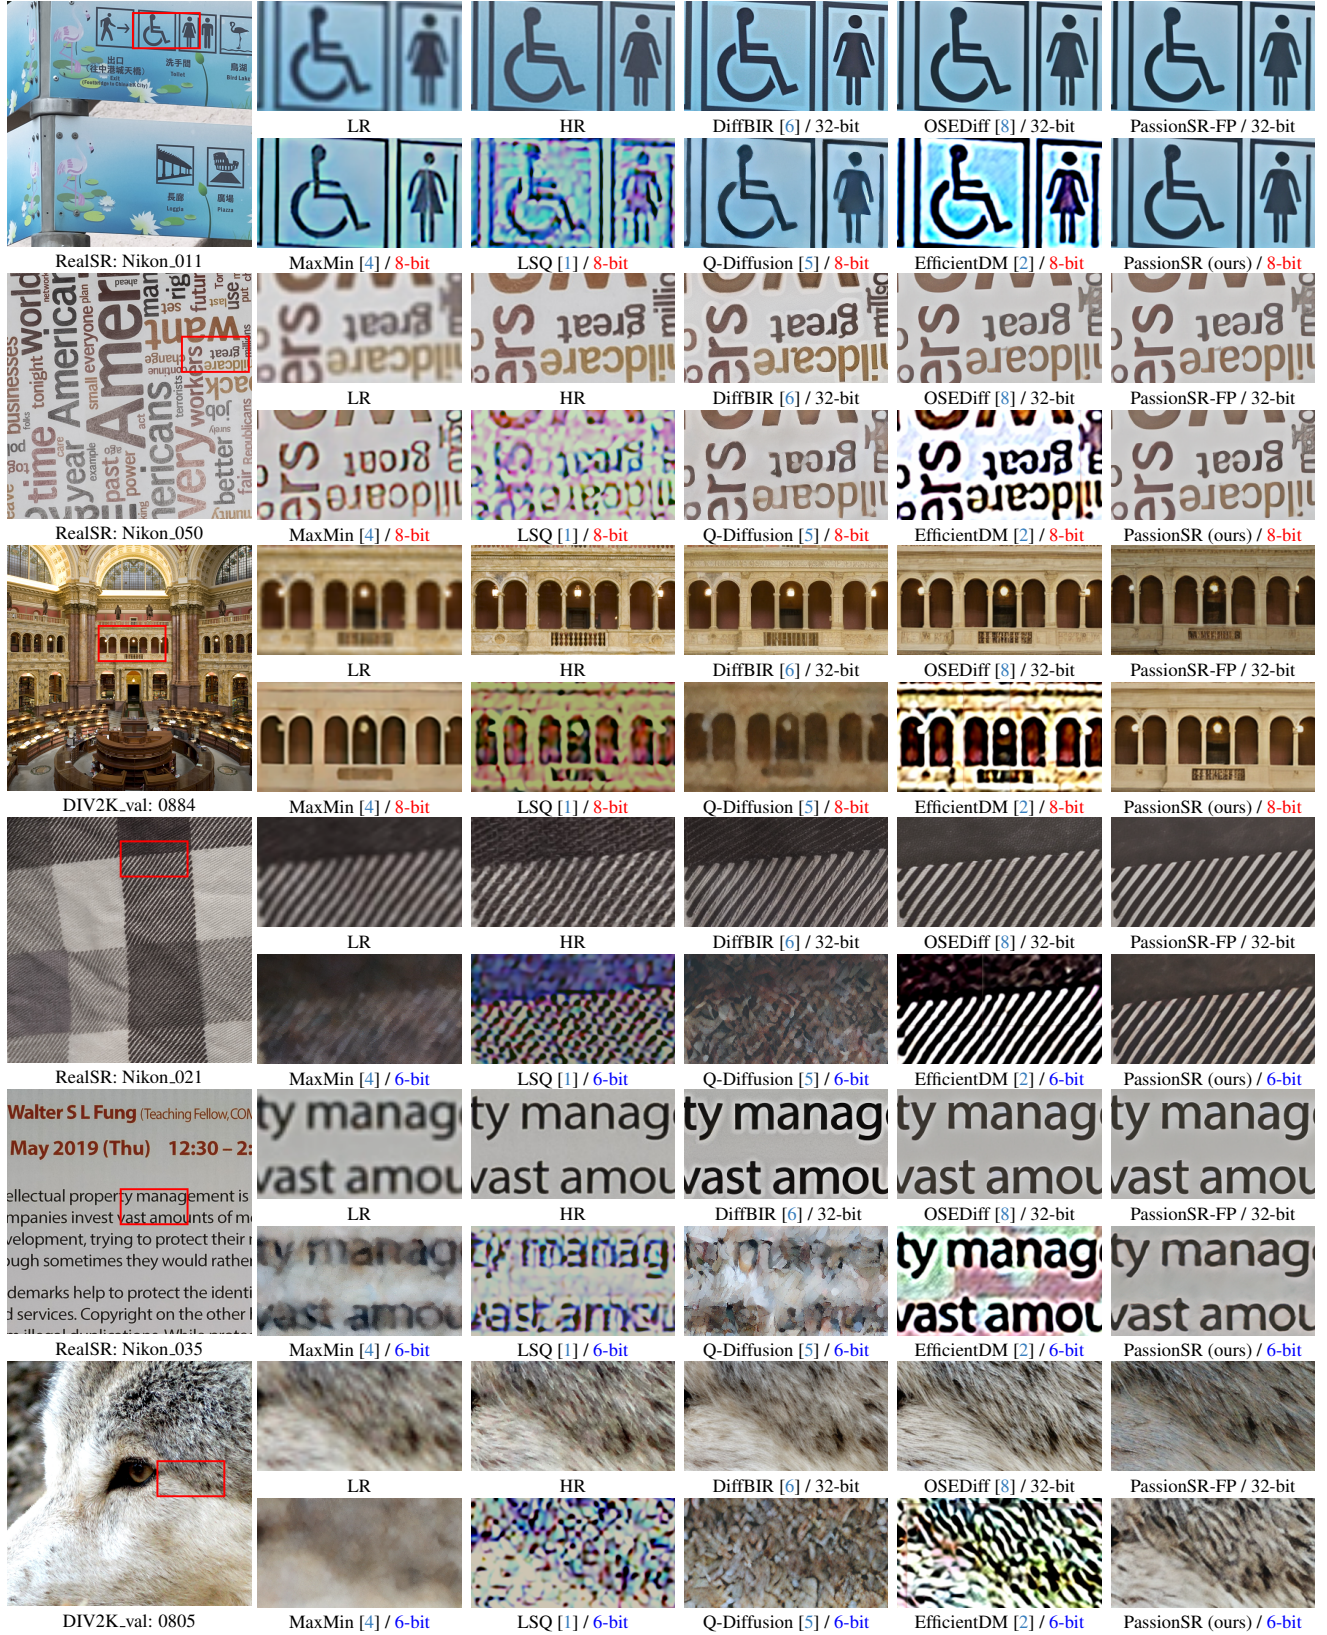

Figure 3. Visual comparison ( $\times 4$ ) with high-resolution image, full-precision model’s output and different quantization methods in some challenging cases at **W8A8** and **W6A6 UNet-only quantization**. PassionSR gains significant visual advantages over other methods.
